# Supplementary material for: High-performance Li6PS5Cl-based all-solid-state lithium-ion batteries
Source: Royal Society of Chemistry journal article supplement (doi:10.1039/c9ta04289j), 2019-01-01
Supplement: c9ta04289j1.pdf [file c9ta04289j1.pdf]

## Supporting Information

### High-Performance $\text{Li}_6\text{PS}_5\text{Cl}$ -Based All-Solid-State Lithium-Ion Battery

Shuo Wang<sup>a</sup>, Xiaofu Xu<sup>b</sup>, Xue Zhang<sup>a</sup>, Chengzhou Xin<sup>a</sup>, Bingqing Xu<sup>a</sup>,  
Liangliang Li<sup>a, \*</sup>, Yuan-Hua Lin<sup>a</sup>, Yang Shen<sup>a</sup>, Baohua Li<sup>b</sup>, Ce-Wen Nan<sup>a, \*</sup>

<sup>a</sup> State Key Laboratory of New Ceramics and Fine Processing, School of Materials  
Science and Engineering, Tsinghua University, Beijing 100084, China

<sup>b</sup> Engineering Laboratory for the Next Generation Power and Energy Storage Batteries,  
Graduate School at Shenzhen, Tsinghua University, Shenzhen 518055, China

\*Corresponding author e-mail: [liliangliang@mail.tsinghua.edu.cn](mailto:liliangliang@mail.tsinghua.edu.cn)

Phone: +86-10-62797162

Fax: +86-10-62771160

Postal address: State Key Laboratory of New Ceramics and Fine Processing, School  
of Materials Science and Engineering, Tsinghua University, Beijing 100084, China

\*Corresponding author e-mail: [cwnan@mail.tsinghua.edu.cn](mailto:cwnan@mail.tsinghua.edu.cn)

Phone: +86-10-62773587

Fax: +86-10-62771160

Postal address: State Key Laboratory of New Ceramics and Fine Processing, School  
of Materials Science and Engineering, Tsinghua University, Beijing 100084, China

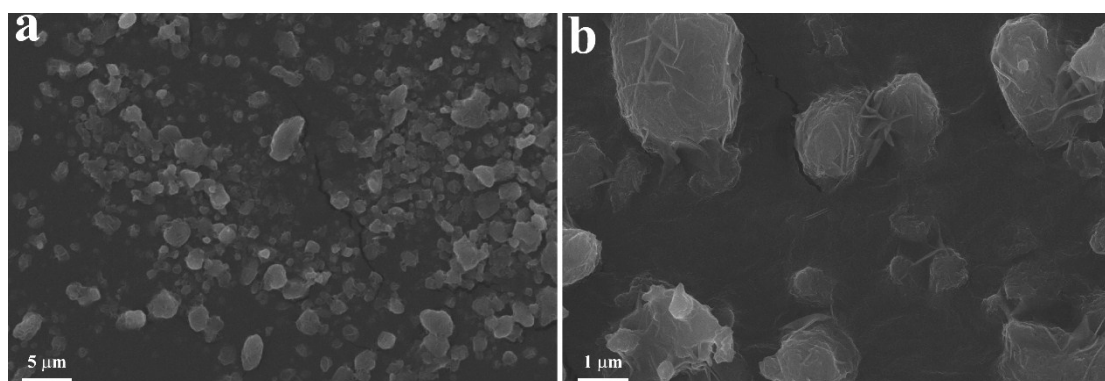

**Fig. S1.** SEM images of the composite cathode powder.

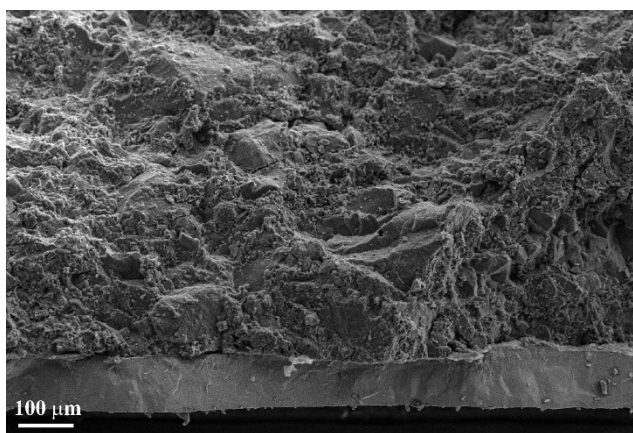

**Fig. S2.** Cross-sectional SEM image at the interface between the  $\text{Li}_6\text{PS}_5\text{Cl}$  electrolyte layer and the Li-In anode before cycling.

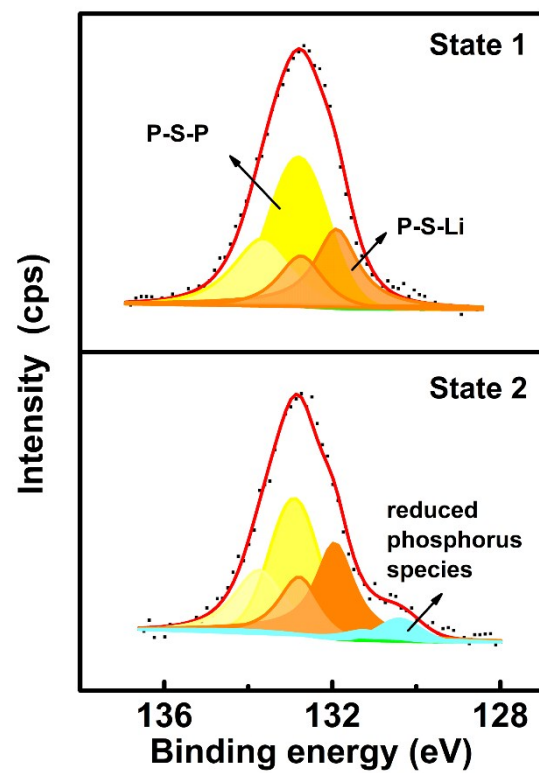

**Fig. S3.** *Ex-situ* P 2p XPS spectra of different states during the charge/discharge process.
